## CORRECTION

# Correction: Hormetic and transgenerational effects in spotted-wing *Drosophila* (Diptera: Drosophilidae) in response to three commonly-used insecticides

Carrie Deans, William D. Hutchison

[Fig 2](#) is incorrect. Figs 2 and 3 are the same. Please see the corrected version of [Fig 2](#) here.

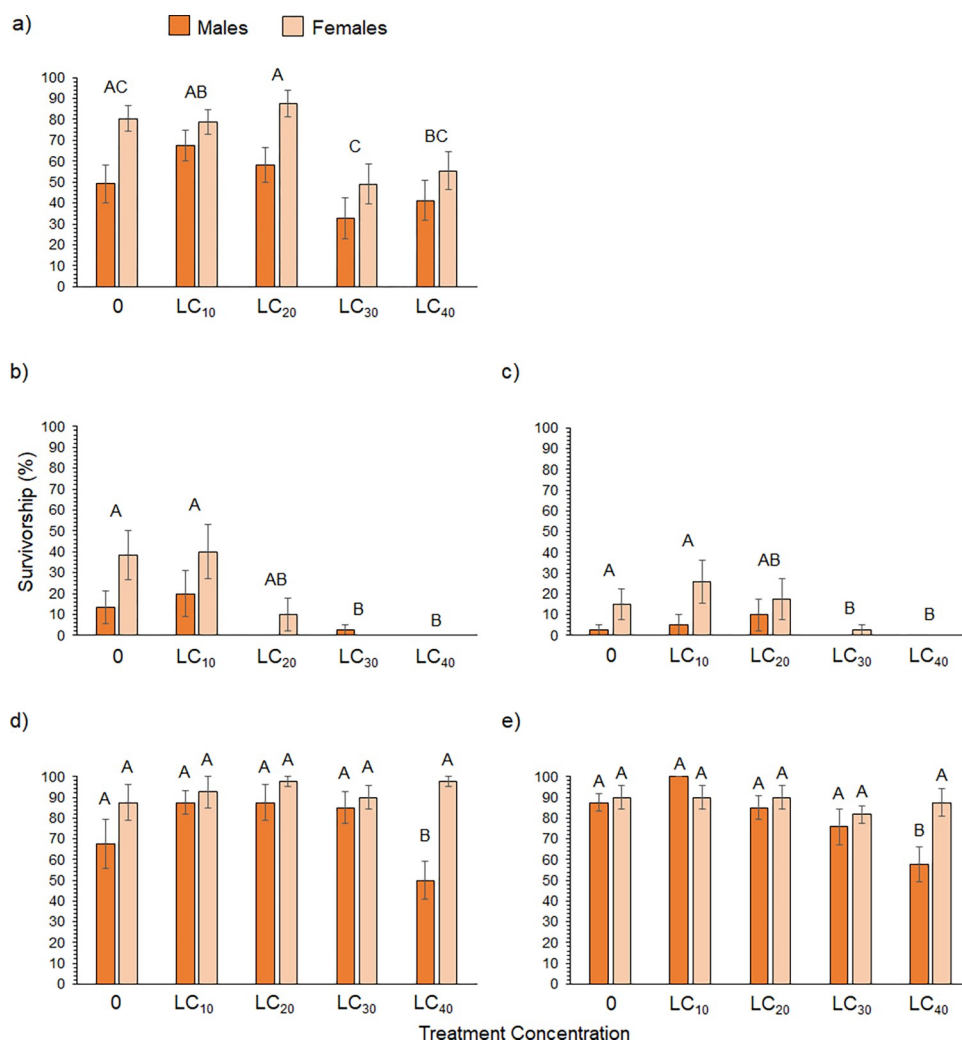

**Fig 2. Survivorship.** Average survivorship for male and female flies across sub-lethal concentrations of (a) zeta-cypermethrin, (b) single-exposure and (c) double-exposure to spinetoram, (d) single-exposure and (d) double-exposure to pyrethrin (N = 10). Different letters indicate significant post-hoc differences between treatments or sex where significant main effects or interactions were found (S1 and S2 Tables; Tukey's Test, P ≤ 0.05).

<https://doi.org/10.1371/journal.pone.0317051.g001>

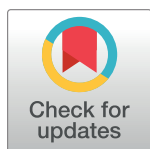

## OPEN ACCESS

**Citation:** Deans C, Hutchison WD (2024) Correction: Hormetic and transgenerational effects in spotted-wing *Drosophila* (Diptera: Drosophilidae) in response to three commonly-used insecticides. PLoS ONE 19(12): e0317051. <https://doi.org/10.1371/journal.pone.0317051>

**Published:** December 31, 2024

**Copyright:** © 2024 Deans, Hutchison. This is an open access article distributed under the terms of the [Creative Commons Attribution License](#), which permits unrestricted use, distribution, and reproduction in any medium, provided the original author and source are credited.

**Table 1. Statistics for the initial dose-response probit analysis for each insecticide.**

| Insecticide       | X <sup>2</sup> | df | P-value | slope | intercept | R <sup>2</sup> |
|-------------------|----------------|----|---------|-------|-----------|----------------|
| zeta-cypermethrin | 0.141          | 2  | 0.932   | 0.444 | 4.702     | 0.842          |
| spinetoram        | 0.231          | 3  | 0.972   | 0.549 | 4.370     | 0.812          |
| pyrethrin         | 0.700          | 2  | 0.705   | 0.725 | 5.817     | 0.972          |

<https://doi.org/10.1371/journal.pone.0317051.t001>

Consequently, in [Table 1](#), the value in R<sup>2</sup> (last column) of Insecticide zeta- cypermethrin (first row) is incorrect. It should have been 0.842. Please see the correct [Table 1](#) here.

Moreover, in the Hormetic effects subsection of Results, there is an error in the second sentence of the first paragraph. The correct sentence is: Overall, female survivorship was 1.4 times higher than that of male flies.

## Reference

1. Deans C, Hutchison WD (2022) Hormetic and transgenerational effects in spotted-wing *Drosophila* (Diptera: Drosophilidae) in response to three commonly-used insecticides. PLOS ONE 17(7): e0271417. <https://doi.org/10.1371/journal.pone.0271417> PMID: 35862486
